# Supplementary material for: Teriparatide in postmenopausal osteoporosis: uncovering novel insights into efficacy and safety compared to other treatments – a systematic review and meta-analysis
Source: PubMed Central journal article supplement (PMC11457814; doi:10.1530/eor-23-0205), 2024-09-02
Supplement: EOR-23-0205supplementary_figure.pdf [file EOR-23-0205supplementary_figure.pdf]

## Supplementary Materials

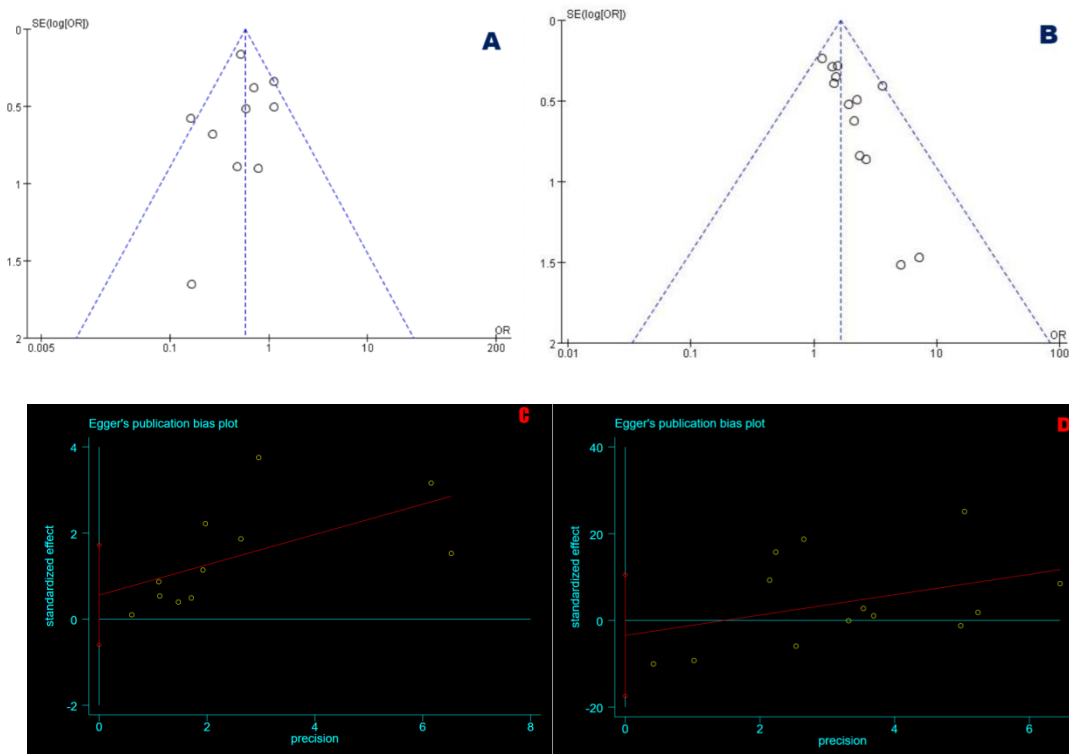

**Figure 6.** Funnel plots for (A) Adverse Event Incidence. (B) Fracture Incidence.

Egger's test for (C) Continuous variable. (D) Binary variable
