# Supplementary material for: Teriparatide in postmenopausal osteoporosis: uncovering novel insights into efficacy and safety compared to other treatments – a systematic review and meta-analysis
Source: PubMed Central journal article supplement (PMC11457814; doi:10.1530/eor-23-0205), 2024-09-02
Supplement: EOR-23-0205supplementary_material.pdf [file EOR-23-0205supplementary_material.pdf]

# **Efficacy and Safety of Teriparatide Compared to Other Treatments for Postmenopausal Osteoporosis: A Systematic Review and Meta-Analysis of Randomized Controlled Trials**

## **Pubmed search: from 2000- January 2023**

((((((((((("Parathyroid Hormone"[Mesh]) OR ( · Hormone, Parathyroid" OR ( · Parathormone" OR ( · Parathyrin" OR ( · Parathyroid Hormone Peptide (1-34)" OR ( · Parathyroid Hormone (1-34)" OR ( · PTH(1-34)" OR ( · Natpara" AND (((((((((((((((("Osteoporosis, Postmenopausal"[Mesh]) OR ( · Perimenopausal Bone Loss" OR ( · Bone Loss, Postmenopausal" OR ( · Bone Losses, Postmenopausal" OR ( · Postmenopausal Bone Losses" OR ( · Osteoporosis, Post-Menopausal" OR ( · Osteoporoses, Post-Menopausal" OR ( · Osteoporosis, Post Menopausal" OR ( · Post-Menopausal Osteoporoses" OR ( · Post-Menopausal Osteoporosis" OR ( · Postmenopausal Osteoporosis" OR ( · Osteoporoses, Postmenopausal" OR ( · Postmenopausal Osteoporoses" OR ( · Bone Loss, Perimenopausal" OR ( · Bone Losses, Perimenopausal" OR ( · Perimenopausal Bone Losses" OR ( · Postmenopausal Bone Loss")) AND ("randomized controlled trial"[pt] OR "controlled clinical trial"[pt] OR randomized[tiab] OR placebo[tiab] OR "drug therapy"[sh] OR randomly[tiab] OR trial[tiab] OR groups[tiab]) AND (2000:2023[pdat]).

## **Web of science search: from 2000- January 2023**

TS=("Parathyroid Hormone" OR "Hormone, Parathyroid" OR "Parathormone" OR "Parathyrin" OR "Parathyroid Hormone Peptide (1-34)" OR "Parathyroid Hormone (1-34)" OR "PTH(1-34)" OR "Natpara")  
AND TS=("Osteoporosis, Postmenopausal" OR "Perimenopausal Bone Loss" OR "Bone Loss, Postmenopausal" OR "Bone Losses, Postmenopausal" OR "Postmenopausal Bone Losses" OR "Osteoporosis, Post-Menopausal" OR "Osteoporoses, Post-Menopausal" OR "Osteoporosis, Post Menopausal" OR "Post-Menopausal Osteoporoses" OR "Post-Menopausal Osteoporosis" OR "Postmenopausal Osteoporosis" OR "Osteoporoses, Postmenopausal" OR "Postmenopausal Osteoporoses" OR "Bone Loss, Perimenopausal" OR "Bone Losses, Perimenopausal" OR "Perimenopausal Bone Losses" OR "Postmenopausal Bone Loss")  
AND TS=("randomized controlled trial" OR "controlled clinical trial" OR "randomized" OR "placebo" OR "drug therapy" OR "randomly" OR "trial" OR "groups")  
AND PY=(2000-2023)

## **Embase search: from 2000- January 2023**

(Parathyroid Hormone/ OR "Parathormone"/ OR "Parathyrin"/ OR "Parathyroid Hormone Peptide (1-34)"/ OR "Parathyroid Hormone (1-34)"/ OR "PTH(1-34)"/ OR "Natpara") AND (Osteoporosis, Postmenopausal/ OR "Perimenopausal Bone Loss"/ OR "Bone Loss, Postmenopausal"/ OR "Bone Losses, Postmenopausal"/ OR "Postmenopausal Bone Losses"/ OR "Osteoporosis, Post-Menopausal"/ OR "Osteoporoses, Postmenopausal"/ OR "Osteoporosis, Post Menopausal"/ OR "Post-Menopausal Osteoporoses"/ OR "Post-Menopausal Osteoporosis"/ OR "Postmenopausal Osteoporosis"/ OR "Osteoporoses, Postmenopausal"/ OR "Postmenopausal

Osteoporoses"/ OR "Bone Loss, Perimenopausal"/ OR "Bone Losses, Perimenopausal"/ OR "Perimenopausal Bone Losses"/ OR "Postmenopausal Bone Loss") AND (Randomized Controlled Trial/ OR "Controlled Clinical Trial"/ OR randomized:ti,ab OR placebo:ti,ab OR "Drug Therapy"/ OR randomly:ti,ab OR trial:ti,ab OR groups:ti,ab) AND (2000-2023/pd)
