# Supplementary material for: Teriparatide in postmenopausal osteoporosis: uncovering novel insights into efficacy and safety compared to other treatments – a systematic review and meta-analysis
Source: PubMed Central journal article supplement (PMC11457814; doi:10.1530/eor-23-0205), 2024-09-02
Supplement: EOR-23-0205supplementary_table.pdf [file EOR-23-0205supplementary_table.pdf]

**Supplementary Table 1: Summary of Characteristics for Included Studies in the Meta-Analysis**

| Authors, Years            | Country                                |                          | Sample size |     | Age, (Mean SD), |            | Adverse Event |     | Fracture |     | BMI (kg/m <sup>2</sup> ; SD) |            | Skeletal site of BMD             | Intervention |                          | Follow-up (month) | BMD assessment |
|---------------------------|----------------------------------------|--------------------------|-------------|-----|-----------------|------------|---------------|-----|----------|-----|------------------------------|------------|----------------------------------|--------------|--------------------------|-------------------|----------------|
|                           |                                        |                          | PTH         | Con | PTH             | Con        | PTH           | Con | PTH      | Con | PTH                          | Con        | PTH                              | Con          | PTH                      |                   |                |
| Anastasilakis, 2008 (1)   | Greece                                 |                          | 22          | 22  | 65.1 ± 1.6      | 64.7 ± 1.5 | 11            | 7   | NR       | NR  | 28.2 ± 1.                    | 28.1 ± 1.  |                                  | 20           | risedronate 35mg/week    | 3,6 ,12           | DXA            |
| Kendler, 2018 (2)         | Europe, America, North America         | South North              | 516         | 533 | 72.6±8.77       | 71.6 ±8.58 | 495           | 500 | 68       | 121 | 26.9 ±4.61                   | 27.1 ±4.64 | NR                               | 20           | risedronate 20 µg/day    | 24                | DXA            |
| Felicia, Cosman, 2011 (3) | USA                                    |                          | 137         | 137 | 65.0±8.8        | 66.1±9.0   | 11            | 6   | 4        | 13  | 25.3±4.15                    | 25.3 ±4.42 | CT <sub>x</sub> , P1NP,LS, TH    | 20           | zoledronic acid 5 mg     | 13                | DXA            |
| Yingchun, 2017 (4)        | China                                  |                          | 50          | 50  | 54.2 ± 8.2      | 54.2 ± 8.2 | 5             | 2   | 2        | 4   | NR                           | NR         | NR,LS ,FN                        | 20           | zoledronic acid 5 mg/day | 6,12              | DXA            |
| Body, 2002 (5)            | United States, Austria, Canada, Mexico | States, Belgium, Israel, | 73          | 73  | 66±8            | 65±9       | 14            | 7   | 3        | 10  | 23.9±4.5                     | 24.4±3.5   | LS, TH,FN                        | 40           | alendronate 10g /day     | 3,6,12,14         | DXA            |
| Deng, 2017 (6)            | China                                  |                          | 43          | 22  | 62.88±5.8       | 62.77±6.42 | 4             | 0   | 0        | 1   | 24.25±2.60                   | 23.5±3.24  | CT <sub>x</sub> , P1NP,LS, TH,FN | 20           | alendronate 70mg/ week   | 6,12              | DXA            |
| Finkelstein, 2010 (7)     | USA                                    |                          | 20          | 29  | 65±7            | 64±6       | NR            | NR  | NR       | NR  | 25.6±4.5                     | 23.4 ± 3.4 | P1NP, Os,LS, FN,R                | 40           | alendronate              | 3,6,18,24, 30     | DXA            |

|                       |       |      |     |            |            |     |    |    |     |            |            |                                  |    |                                       |          |     |
|-----------------------|-------|------|-----|------------|------------|-----|----|----|-----|------------|------------|----------------------------------|----|---------------------------------------|----------|-----|
| Michael. McClung, (8) | USA   | 102  | 101 | 65.3 ± 8.4 | 66.6 ± 8.5 | 18  | 13 | 9  | 8   | 25.7 ± 4.0 | 25.3 ± 4.5 | P1NP,LS, FN                      | 20 | 10 mg/day<br>Alendronate<br>35 mg/day | 3,6,18   | DXA |
| Keaveny, (9)          | USA   | 28   | 25  | 64.5 ± 1.4 | 62.5 ± 1.6 | NR  | NR | NR | NR  | 26.3 ± 0.8 | 26.6 ± 0.9 | CT <sub>x</sub> ,<br>P1NP,LS ,FN | 20 | Alendronate<br>10 mg/day              | 6,18     | DXA |
| Tang, 2019 (10)       | China | 28   | 26  | 61.7±6.6   | 62.8±7.3   | NR  | NR | NR | NR  | 24.8±1.3   | 26±4       | CTX,<br>P1NP,Os,LS,<br>TH,FN,R   | 20 | Alendronate<br>70mg/week              | 1,3,6,12 | DXA |
| Chiba, 2022 (11)      | Japan | 91   | 40  | 71.7 ± 6.9 | 71.9 ± 7.0 | 7   | 0  | 40 | 21  | 23.4 ± 3.4 | 22.6 ± 2.9 | P1NP,LS,<br>TH,FN,R              | 20 | Alendronate<br>35mg/week              | 6,18,    | DXA |
| Mei, 2022 (12)        | China | 121  | 32  | 66.48±8.17 | 65.13±6.97 | 92  | 15 | 39 | 18  | NR         | NR         | CT <sub>x</sub> , P1NP,LS,<br>FN | 20 | S. Calcitonin<br>NR                   | 12, 24   | RCT |
| Li ying,2013 (13)     | China | 341  | 112 | 65.1±7.1   | 65.0±7.3   | 251 | 79 | 11 | 6   | 23.1 ± 3.1 | 23.4 ± 3.3 | CT <sub>x</sub> ,LS, FN          | 20 | Elcatonin<br>20U/week                 | 6,12,18  | DXA |
| Zhang, 2009 (14)      | China | 100  | 105 | 64.70±7.67 | 65.78±7.62 | 67  | 62 | NR | NR  | 23.38±3.17 | 23.60±3.29 | NR,LS ,FN                        | 20 | Elcatonin<br>20U/wks                  | 3,6      | DXA |
| Yan, 2014 (15)        | China | 40   | 13  | 65.1±7.6   | 65.5±8.7   | 12  | 2  | 5  | 2   | NR         | NR         | CT <sub>x</sub> ,LS ,FN          | 20 | Elcatonin<br>20U/week                 | 6,12,18  | DXA |
| Gonnelli, (16)        | Italy | 27   | 28  | 71.3±7.0   | 71.0±6.8   | NR  | NR | NR | NR  | 24.7±3.3   | 24.8±3.1   | LS, TH,FN                        | 20 | antiresorptive agent<br>NR            | 6,12     | DXA |
| Neer, (17)            | USA   | 1093 | 544 | 69±7       | 69±7       | 33  | 11 | 79 | 136 | 26.6±4.3   | 26.7±4.7   | LS, TH,FN,R                      | 20 | Placebo<br>NR                         | 24       | DXA |
| Tsai, 2013(18)        | USA   | 27   | 23  | 65.7±7.9   | 66.3±8.3   | 1   | 1  | NR | NR  | 25.5±3.8   | 24.9±3.9   | LS, TH                           | 20 | Denosumab<br>60 mg<br>/6 months       | 24       | DXA |

|                       |     |     |     |          |          |     |     |    |    |          |           |            |    |                                      |      |     |
|-----------------------|-----|-----|-----|----------|----------|-----|-----|----|----|----------|-----------|------------|----|--------------------------------------|------|-----|
| Leder, 2015(19)       | USA | 27  | 27  | 66.1±7.9 | 65.0±6.2 | 6   | 4   | 14 | 10 | 25.5±3.7 | 23.8±4.1  | TH         | 20 | Denosumab<br>60 mg<br>/6 months      | 24   | DXA |
| Z. Leder<br>2015 (20) | USA | 45  | 43  | 64.5±7.5 | 66.3±7.0 | 12  | 9   | NR | NR | 26.0±3.4 | 26.4 ±2.9 | TH, FN     | 20 | Abaloparati<br>de<br>20/d            | 6,12 | DXA |
| Genant<br>2017(21)    | USA | 31  | 24  | 65.8±5.7 | 64.3±4.7 | NR  | NR  | NR | NR | NR       | NR        | LS, TH, FN | 20 | Romosozu<br>mab<br>210 mg /<br>month | 12   | DXA |
| Keaveny<br>2017(22)   | USA | 31  | 24  | 65.8±5.7 | 64.3±4.7 | NR  | NR  | NR | NR | NR       | NR        | LS         | 20 | Romosozu<br>mab<br>210 mg /<br>month | 12   | DXA |
| Langdahl 2017<br>(23) | USA | 214 | 218 | 71.2±7.7 | 71.8±7.4 | 148 | 164 | NR | NR | NR       | NR        | TH         | 20 | Romosozu<br>mab<br>210 mg /<br>month | 6,12 | DXA |

PTH – parathyroid hormone ; Con – Control ; NR– Not reported; BMD – bone mineral density; SI – subcutaneous injection; LS – lumbar spine; TH – total hip; FN –Femoral Neck; R – radius; DXA – dual-energy ; x-ray– absorptiometry; CTx – xbeta-C-terminal telopeptide ; P1NP – type 1 procollagen amino-terminal peptides ;Os – osteocalcin.

## Reference

[1].Anastasilakis, A. D., Goulis, D. G., Polyzos, S. A., Gerou, S., Koukoulis, G. N., Efstathiadou, Z., ... & Avramidis, A. (2008). Head-to-head comparison of risedronate vs. teriparatide on bone turnover markers in women with postmenopausal osteoporosis: a randomized

trial. *International journal of clinical practice*, 62(6), 919-924.

[2].Kendler, D. L., Marin, F., Zerbini, C. A., Russo, L. A., Greenspan, S. L., Zikan, V., ... & López-Romero, P. (2018). Effects of teriparatide and risedronate on new fractures in postmenopausal women with severe osteoporosis (VERO): a multicentre, double-blind, double-dummy, randomized controlled trial. *The Lancet*, 391(10117), 230-240.

[3].Cosman, F., Eriksen, E. F., Recknor, C., Miller, P. D., Guañabens, N., Kasperk, C., ... & Boonen, S. (2011). Effects of intravenous zoledronic acid plus subcutaneous teriparatide [rhPTH (1–34)] in postmenopausal osteoporosis. *Journal of Bone and Mineral Research*, 26(3), 503-511.

[4].Wu Yingchun, Sun Hui. Comparative study of the efficacy of parathyroid hormone (1-34), strontium ranelate and zoledronic acid in postmenopausal osteoporosis [J]. *Chinese Journal of Osteoporosis*, 2017,23 (10): 1276-1279.

[5].Body, J. J., Gaich, G. A., Scheele, W. H., Kulkarni, P. M., Miller, P. D., Peretz, A., ... & Hodsman, A. B. (2002). A randomized double-blind trial to compare the efficacy of teriparatide [recombinant human parathyroid hormone (1–34)] with alendronate in postmenopausal women with osteoporosis. *The Journal of Clinical Endocrinology & Metabolism*, 87(10), 4528-4535.

[6].Deng, J., Feng, Z., Li, Y., Pan, T., Li, Q., & Zhao, C. (2018). Efficacy and safety of recombinant human parathyroid hormone (1–34) are similar to those of alendronate in the treatment of postmenopausal osteoporosis. *Medicine*, 97(47).

[7].Finkelstein, J. S., Wyland, J. J., Lee, H., & Neer, R. M. (2010). Effects of teriparatide, alendronate, or both in women with postmenopausal osteoporosis. *The Journal of Clinical Endocrinology & Metabolism*, 95(4), 1838-1845.

- [8].McClung, M. R., San Martin, J., Miller, P. D., Civitelli, R., Bandeira, F., Omizo, M., ... & Eriksen, E. F. (2005). Opposite bone remodeling effects of teriparatide and alendronate in increasing bone mass. *Archives of internal medicine*, 165(15), 1762-1768.
- [9].Keaveny, T. M., Donley, D. W., Hoffmann, P. F., Mitlak, B. H., Glass, E. V., & San Martin, J. A. (2007). Effects of teriparatide and alendronate on vertebral strength as assessed by finite element modeling of QCT scans in women with osteoporosis. *Journal of bone and mineral research*, 22(1), 149-157.
- [10].Tang, Y., Xia, H., Kang, L., Sun, Q., Su, Z., Hao, C., & Xue, Y. (2019). Effects of intermittent parathyroid hormone 1–34 administration on circulating mesenchymal stem cells in postmenopausal osteoporotic women. *Medical Science Monitor: International Medical Journal of Experimental and Clinical Research*, 25, 259.
- [11].Chiba, K., Okazaki, N., Kurogi, A., Watanabe, T., Mori, A., Suzuki, N., ... & Osaki, M. (2022). Randomized controlled trial of daily teriparatide, weekly high-dose teriparatide, or bisphosphonate in patients with postmenopausal osteoporosis: The TERABIT study. *Bone*, 160, 116416.
- [12].Li Mei, Zhang Zhenlin, Lin Hua, etc. Efficacy and safety of domestic rhPTH1-34 in treating postmenopausal osteoporosis: a randomized controlled, multicenter clinical study [J]. *Chinese Journal of Osteoporosis and Bone Mineral Salt Diseases*, 2022,15 (02): 135-141.
- [13].Li, Y., Xuan, M., Wang, B., Yang, J., Zhang, H., Zhang, X. Z., & Guo, X. H. (2013). Comparison of parathyroid hormone (1-34) and elcatonin in postmenopausal women with osteoporosis: an 18-month randomized, multicenter controlled trial in China. *Chinese Medical*

Journal, 126(03), 457-463.

[14].Zhang, X. Z., Wang, B., Yang, J., Xuan, M., Song, L. G., Li, H., ... & JIA, Y. (2009). A randomized, multicenter controlled trial to compare the efficacy of recombinant human parathyroid hormone (1-34) with elcatonin in postmenopausal women with osteoporosis in China. *Chinese Medical Journal*, 122(24), 2933-2938.

[15].Yang Yan, Li Pengqiu, Zhu Xianjun, etc. Randomized controlled study of recombinant human parathyroid hormone (1-34) and descalcitonin for the treatment of primary osteoporosis [J]. *Chinese Journal of Osteoporosis*, 2014,20 (02): 137-141 + 155.

[16].Gonnelli, S., Martini, G., Caffarelli, C., Salvadori, S., Cadirni, A., Montagnani, A., & Nuti, R. (2006). Teriparatide's effects on quantitative ultrasound parameters and bone density in women with established osteoporosis. *Osteoporosis International*, 17, 1524-1531.

[17].Neer, R. M., Arnaud, C. D., Zanchetta, J. R., Prince, R., Gaich, G. A., Reginster, J. Y., ... & Mitlak, B. H. (2001). Effect of parathyroid hormone (1-34) on fractures and bone mineral density in postmenopausal women with osteoporosis. *New England journal of medicine*, 344(19), 1434-1441.

[18].Tsai, J. N., Uihlein, A. V., Lee, H., Kumbhani, R., Siwila-Sackman, E., McKay, E. A., et al. (2013). Teriparatide and Denosumab, Alone or Combined, in Women with Postmenopausal Osteoporosis: the DATA Study Randomised Trial. *Lancet* 382 (9886), 50–56. doi:10.1016/s0140-6736(13)60856-9

[19].Leder, B. Z., Tsai, J. N., Uihlein, A. V., Wallace, P. M., Lee, H., Neer, R. M., et al. (2015). Denosumab and Teriparatide Transitions in

Postmenopausal Osteoporosis (The DATA-Switch Study): Extension of a Randomised Controlled Trial. *Lancet* 386 (9999), 1147–1155.

doi:10.1016/s0140-6736(15)61120-5

[20].Leder, Benjamin Z., et al. "Effects of abaloparatide, a human parathyroid hormone-related peptide analog, on bone mineral density in postmenopausal women with osteoporosis." *The Journal of Clinical Endocrinology & Metabolism* 100.2 (2015): 697-706.<https://doi.org/10.1210/jc.2014-3718>

[21].Genant HK, Engelke K, Bolognese MA, et al. Effects of romosozumab compared with teriparatide on bone density and mass at the spine and hip in postmenopausal women with low bone mass. *J Bone Miner Res.*, 2017, 32: 181–187.<https://doi.org/10.1002/jbmr.2932>

[22].Keaveny TM, Crittenden DB, Bolognese MA, et al. Greater gains in spine and hip strength for Romosozumab compared with Teriparatide in postmenopausal women with low bone mass. *J Bone Miner Res.*, 2017, 32: 1956–1962.<https://doi.org/10.1002/jbmr.3176>

[23].Langdahl BL, Libanati C, Crittenden DB, et al. Romosozumab (sclerostin monoclonal antibody) versus teriparatide in postmenopausal women with osteoporosis transitioning from oral bisphosphonate therapy: a randomised, open-label, phase 3 trial. *Lancet.*, 2017, 390: 1585–1594.[https://doi.org/10.1016/S0140-6736\(17\)31613-6](https://doi.org/10.1016/S0140-6736(17)31613-6)
